1  
2  
3  
4  
5  
6  
7  
8  
9  
10  
11  
12  
13  
14  
15  
16  
17  
18  
19

# **COVID-19 and Cognitive Impairment: Severity, Evolution, and Functional Impact during Inpatient Rehabilitation**

Ruchi Patel MA OTR/L<sup>1</sup>, Irene Savrides MA OTR/L<sup>1</sup>, Christine Cahalan MS OTR/L<sup>1</sup>, Gargi Doulatani MA<sup>2</sup>, Michael W. O'Dell MD<sup>1,2</sup>, Joan Toglia PhD OTR/L<sup>1,2,4</sup>, & Abhishek Jaywant, PhD<sup>1,2,3</sup>

<sup>1</sup>Department of Rehabilitation Medicine, NewYork-Presbyterian Hospital/Weill Cornell Medical Center

<sup>2</sup>Department of Rehabilitation Medicine, Weill Cornell Medicine

<sup>3</sup>Department of Psychiatry, Weill Cornell Medicine

<sup>4</sup>School of Health and Natural Sciences, Mercy College

**Manuscript Word Count:** 1196 words

**Corresponding Author:**

Abhishek Jaywant, PhD

525 E 68<sup>th</sup> St, F-1232, New York NY 10065

Email: [abj2006@med.cornell.edu](mailto:abj2006@med.cornell.edu)

Tel: 857-225-5783

20  
21  
22  
23  
24  
25  
26  
27  
28  
29  
30  
31  
32  
33  
34  
35  
36  
37  
38  
39  
40  
41

## Abstract

**Objective:** To determine the frequency, magnitude, and change in cognitive impairment in patients with COVID-19 undergoing acute inpatient rehabilitation. We secondarily evaluated correlates of cognitive impairment and the relationship between cognition and functional gain.

**Design:** Cross-sectional observational study with assessments at admission and discharge

**Setting:** Acute inpatient rehabilitation unit within a large, urban academic medical center

**Participants:** 77 patients hospitalized for COVID-19 and subsequently admitted to an inpatient rehabilitation unit between March-August 2020, 45 of whom were re-assessed at discharge.

**Interventions:** N/A

**Main Outcome Measures:** Montreal Cognitive Assessment (MoCA) scores on admission and discharge (when available) and Quality Indicator for Self-Care (QI-SC) scores on admission and discharge.

**Results:** 62/77 (80.5%) of patients demonstrated cognitive deficits on the MoCA at admission: 39/77 (50.6%) were mildly impaired, 20/77 (26%) moderately impaired, and 3/77 (3.9%) severely impaired. Cognitive impairment was associated with a prior history of delirium, but not age or length of acute care hospitalization. 32/45 (71.1%) patients with discharge scores improved and met the MoCA minimally clinically important difference (MCID); however, 35/45 (77.8%) continued to score in the impaired range. Patients who met the MoCA MCID demonstrated significantly greater QI-SC score gains than those that did not meet the MCID ( $p=.02$ ).

**Conclusion:** Cognitive impairment is common among hospitalized COVID-19 patients requiring acute inpatient rehabilitation. Cognitive impairment improves over the course of inpatient

42 rehabilitation, and is associated with functional gain. Nonetheless, cognitive deficits frequently  
43 remain present at discharge, indicating the need for systematic assessment and follow-up,  
44 especially given the association with functional outcome.

45 **Key Words:** Coronavirus, SARS-CoV-2, Cognition, Activities of Daily Living, Rehabilitation

## 46 **1.Introduction**

47 Acute and critical illness frequently result in cognitive impairment, affecting function and quality  
48 of life<sup>1</sup>. COVID-19 can result in respiratory distress, hypoxia, ICU admission,  
49 intubation/ventilation, delirium, and vascular complications, all associated with cognitive  
50 impairment<sup>2</sup>. Cognitive deficits lead to dependence in activities of daily living<sup>3</sup> (ADLs),  
51 prompting the need for assessing and treating cognitive dysfunction to optimize function.

52 Studies on COVID-19 show a high frequency of cognitive impairment in mild to severe disease  
53 expressions. Among community-dwelling patients with mild cases of COVID-19, 21% of  
54 patients experienced a decline in cognitive functioning<sup>4</sup>. 81% of hospitalized but post-acute  
55 COVID-19 patients score abnormally on neuropsychological measures of attention, processing  
56 speed, and executive function<sup>5</sup>. There is still limited knowledge on how cognitive deficits evolve  
57 and impact functional outcome. One study found 80% of COVID-19 patients on a rehabilitation  
58 unit had cognitive deficits, with continued impairment in over half of the patients at 1 month  
59 follow-up<sup>6</sup>; however, the relationship to functional gain was not evaluated. This study aims to  
60 determine the magnitude and change in cognitive impairment, correlates of cognitive  
61 impairment, and the relation between cognition and function, in a relatively large sample of  
62 COVID-19 patients admitted to inpatient rehabilitation.

63

## 64 **2.Methods**

65 94 patients hospitalized for COVID-19 were admitted to an inpatient rehabilitation unit (IRU)  
66 from March-August 2020. Seventeen patients were not administered our cognitive measure as  
67 they were either deemed as not exhibiting cognitive impairment during instrumental ADLs or

68 underwent other cognitive testing, resulting in a final sample of 77. Patients were medically  
69 stable, able to tolerate 3 hours/day of therapy, and had potential to gain function. Infection  
70 control guidelines were followed, allowing for admission of positive COVID-19 patients and in-  
71 person administration of our cognitive measure. All data were extracted from retrospective chart  
72 reviews under approval of the Weill Cornell Medicine Institutional Review Board. 19/77 patients  
73 underwent a separate neuropsychological evaluation during their admission, the results of which  
74 have been published<sup>5</sup>; the results described here are novel.

75 Demographic/clinical data extracted included age, gender, prior level of function, intubation  
76 history and length, delirium history, and IRU and acute care lengths of stay (LOS) (Table 1).

77 The Montreal Cognitive Assessment (MoCA) was administered by occupational therapists (OT)  
78 72 hours before/after admission to the IRU. The minimal clinical important difference (MCID)  
79 of 3 points was used<sup>7</sup>. Scores range from 0-30 and are stratified as follows:  $\geq 26$ =normal, 18-  
80 25=mild impairment, 11-17=moderate impairment, and  $\leq 10$ =severe impairment<sup>8</sup>. Admission  
81 MoCA assessments were administered on all 77 subjects and discharge MoCA assessments on  
82 45/77. Three patients received the Blind MoCA, which was converted to 30-point scale per  
83 established guidelines<sup>8</sup>. 32 patients did not receive discharge assessment as they either scored  
84 normal on the initial assessment, were unavailable, and/or declined.

85 The Quality Indicator for Self-Care (QI-SC) is a standard of care functional assessment for  
86 inpatient rehabilitation facilities. Items scored on a scale of 1 to 6 include eating, grooming,  
87 toileting, bathing, upper body dressing, lower body dressing, and donning/doffing footwear.  
88 Total score ranges from 7, indicating total assistance, to 42, indicating independence<sup>9</sup>. The QI-  
89 SC is reliable and discriminates between the quality of care among rehabilitation facilities<sup>9</sup>. OTs  
90 assigned admission and discharge QI-SC scores to all participants.

91 Statistical analyses used non-parametric tests to evaluate group differences (Mann-Whitney U),  
92 within-group change from admission to discharge (Wilcoxon Signed-Ranks Test), association  
93 between continuous variables (Spearman rank-order correlations), and chi-square tests for  
94 categorical variables. Effect sizes are reported as Cohen's d.

95

### 96 **3.Results**

97 80.5% of patients demonstrated cognitive deficits on the MoCA at admission, of whom 15/77  
98 were in the normal range, 39/77 had mild deficits, 20/77 had moderate deficits, and 3/77 had  
99 severe deficits (Figure 1). Admission MoCA scores were higher for patients who did not  
100 previously have delirium ( $M=22.03$ ,  $SD=4.64$ ) than patients who previously had delirium  
101 ( $M=18.95$ ,  $SD=5.8$ ),  $U=466.5$ ,  $p=.02$ , Cohen's  $d=.58$ . Admission MoCA did not differ based on  
102 whether a patient was intubated ( $U=454.5$ ,  $p=.82$ ), age ( $r_s=-.15$ ,  $p=.19$ ) or acute hospitalization  
103 length of stay ( $r_s=-.08$ ,  $p=.50$ ).

104 Patients with discharge MoCA scores ( $n=45$ ) did not differ from those who were not  
105 administered the MoCA at discharge ( $n=32$ ) in age, gender, prior neurologic history, prior  
106 delirium, prior intubation, or prior hypoxia (all  $p$ 's  $>.05$ ). These 45 patients with admission and  
107 discharge MoCA scores improved on the MoCA ( $M=4.02$ ,  $SD=3.67$ ,  $Z=5.08$ ,  $p<.001$ , Cohen's  
108  $d=1.10$ ) and QI-SC ( $M=12.2$ ,  $SD=6.18$ ,  $Z=5.47$ ,  $p<.001$ , Cohen's  $d=1.97$ ). 32/45 patients  
109 improved and met the MoCA MCID at discharge. This group of patients had a greater increase in  
110 QI-SC scores ( $M=13.88$ ,  $SD=5.01$ ) versus patients who did not meet the MCID or declined  
111 ( $M=9.46$ ,  $SD=7.79$ ), Mann-Whitney  $U=113.0$ ,  $p=.02$ , Cohen's  $d=0.75$ , a relationship that  
112 persisted in a linear regression model accounting for age and delirium. Despite overall

113 improvement, 28/45 patients still had mild deficits on the MoCA at discharge, 7 had moderate  
114 deficits, none had severe deficits, and 10 scored in the normal range.

115

#### 116 **4.Discussion**

117 Among 77 COVID-19 patients undergoing acute inpatient rehabilitation, 80.5% of patients  
118 demonstrated cognitive impairment, the majority of whom had mild deficits. This number is  
119 consistent with studies using neuropsychological assessments to evaluate cognition in  
120 hospitalized COVID-19 patients<sup>5-6</sup> and expands on these findings with a larger sample than  
121 previous studies. Consistent with the literature, delirium during acute hospitalization is  
122 associated with greater cognitive impairment at admission<sup>10</sup>, emphasizing the importance of  
123 early detection and management of delirium in COVID-19. The lack of association between  
124 admission cognitive impairment and intubation is also consistent with prior work.<sup>5</sup>

125 COVID-19 patients exhibited significant improvement in cognition with a large effect size.  
126 32/45 (71.1%) percent exhibited clinically meaningful improvement, possibly reflecting natural  
127 recovery, improvement in residual acute mental status changes, and/or rehabilitation intervention  
128 effects. Mean QI-SC scores for this subgroup improved with a large effect size, signifying that  
129 patients required less assistance for basic ADLs. Notably, significantly greater functional  
130 improvement was seen in patients who exhibited a clinically meaningful improvement in  
131 cognition than those that did not. Cognitive ability is associated with short- and long-term  
132 independence with self-care tasks in older adults<sup>3</sup> and our results reinforce the importance of  
133 targeting cognition to improve functional gains in COVID-19. COVID-19 patients warrant  
134 further follow-up as a majority continued to demonstrate mild deficits at discharge.

135 *4.1. Study Limitations*

136 Discharge cognitive data was not available for 32/77 patients, limiting the ability to determine  
137 the true prevalence of cognitive deficits in our sample, although there were no  
138 demographic/clinical differences between the 45 with and 32 without discharge cognitive data.  
139 Further research is necessary regarding the underlying etiology of the cognitive deficits as  
140 imaging results and the effects of psychiatric illness<sup>5</sup> were not addressed in this sample. Finally,  
141 this sample included a relatively sick group of patients from the first wave of COVID-19;  
142 findings may not apply to milder disease presentations or from subsequent waves of illness.

143

144 **5. Conclusion**

145 This study confirms the presence of cognitive impairment in COVID-19 patients with prolonged  
146 hospitalization requiring inpatient rehabilitation and provides new insights into the evolution of  
147 cognitive status. As most patients demonstrated mild/moderate cognitive deficits on admission,  
148 routine cognitive screening should be conducted for COVID-19 patients. Despite improvement  
149 during inpatient rehabilitation, a majority demonstrated mild cognitive deficits at discharge,  
150 indicating ongoing cognitive needs. As cognitive improvement is associated with functional  
151 gain, interventions targeting cognitive dysfunction in the acute inpatient rehabilitation setting  
152 may be important in optimizing independence.

153

154

155



156 **Acknowledgements:** The authors received no funding to complete this study. All authors have  
157 no conflicts or competing interests to declare. AJ is funded through a Career Development  
158 Award from the National Center of Medical Rehabilitation Research/ Eunice Kennedy Shriver  
159 National Institute of Child Health and Human Development (1K12HD093427-04), via a  
160 subaward from Georgetown University. We thank the staff of the IRU for assisting in cognitive  
161 and functional assessments, and for caring for, our COVID-19 patients.

162

### 163 **References**

164 1. Ehlenbach WJ, Hough CL, Crane PK, et al. Association between acute care and critical illness  
165 hospitalization and cognitive function in older adults. *JAMA*. 2010;303(8):763–770.

166 doi:10.1001/jama.2010.167

167 2. Wilcox ME, Brummel NE, Archer K, Ely EW, Jackson JC, Hopkins RO. Cognitive  
168 dysfunction in ICU patients: risk factors, predictors, and rehabilitation interventions. *Crit Care*  
169 *Med*. 2013 Sep;41(9 Suppl 1): S81-98. doi: 10.1097/CCM.0b013e3182a16946. PMID:  
170 23989098.

171 3. Millán-Calenti JC, Tubío, J., Pita-Fernández, S., Rochette, S., Lorenzo, T., Maseda, A.  
172 Cognitive impairment as predictor of functional dependence in an elderly sample. *Archives of*  
173 *Gerontology and Geriatrics*. 2012;54(1):197-201. <https://doi.org/10.1016/j.archger.2011.02.010>.

174 4. Del Brutto, O.H., Wu, S., Mera, R.M., Costa, A.F., Recalde, B.Y. and Issa, N.P. Cognitive  
175 decline among individuals with history of mild symptomatic SARS-CoV-2 infection: A  
176 longitudinal prospective study nested to a population cohort. *Eur J Neurol*. 2021

177 <https://doi.org/10.1111/ene.14775> Online ahead of print.

- 178 5. Jaywant A, Vanderlind WM, Alexopoulos GS, Fridman CB, Perlis RH, Gunning FM.  
179 Frequency and profile of objective cognitive deficits in hospitalized patients recovering from  
180 COVID-19. *Neuropsychopharmacology*. 2021 Feb 15:1–6. doi: 10.1038/s41386-021-00978-8.  
181 Epub ahead of print. PMID: 33589778; PMCID: PMC7884062.
- 182 6. Alemanno F, Houdayer E, Parma A, Spina A, Del Forno A, Scatolini A, Angelone S,  
183 Brugliera L, Tettamanti A, Beretta L, Iannaccone S. COVID-19 cognitive deficits after  
184 respiratory assistance in the subacute phase: A COVID-rehabilitation unit experience. *PLoS One*.  
185 2021 Feb 8;16(2):e0246590. doi: 10.1371/journal.pone.0246590. PMID: 33556127; PMCID:  
186 PMC7870071. eCollection 2021.
- 187 7. Wu CY, Hung SJ, Lin KC, Chen KH, Chen P, Tsay PK. Responsiveness, minimal clinically  
188 important difference, and validity of the MoCA in stroke rehabilitation. *Occup Ther Int*. 2019  
189 Apr 14:2517658. doi: 10.1155/2019/2517658. PMID: 31097928; PMCID: PMC6487084.
- 190 8. [www.mocatest.org](http://www.mocatest.org) Accessed March 1<sup>st</sup>, 2021.
- 191 9. Pardasaney PK, Deutsch A, Iriundo-Perez J, Ingber MJ, McMullen T. Measuring inpatient  
192 rehabilitation facility quality of care: Discharge self-care functional status quality measure. *Arch*  
193 *Phys Med Rehabil*. 2018 Jun;99(6):1035-1041. doi: 10.1016/j.apmr.2017.02.023. Epub 2017  
194 Mar 28. PMID: 28363701.
- 195 10. Hopkins RO, Jackson JC. Short- and long-term cognitive outcomes in intensive care unit  
196 survivors. *Clin Chest Med*. 2009 Mar;30(1):143-53, ix. doi: 10.1016/j.ccm.2008.11.001. PMID:  
197 19186286.
- 198

| <b>Table 1.</b> Demographics and clinical characteristics of main sample and subsample with discharge MoCA. Patients without discharge MoCA are included for comparison. |                                     |                                                       |                                                           |
|--------------------------------------------------------------------------------------------------------------------------------------------------------------------------|-------------------------------------|-------------------------------------------------------|-----------------------------------------------------------|
|                                                                                                                                                                          | <b>N=77</b><br><b>(Full Sample)</b> | <b>N= 45</b><br><b>(Patients with discharge MoCA)</b> | <b>N=32</b><br><b>(Patients without a discharge MoCA)</b> |
| Gender                                                                                                                                                                   |                                     |                                                       |                                                           |
| Male                                                                                                                                                                     | 49 (63.6%)                          | 30 (66.7%)                                            | 19 (59.4%)                                                |
| Female                                                                                                                                                                   | 28 (36.4%)                          | 15 (33.3%)                                            | 13 (40.6%)                                                |
| Age                                                                                                                                                                      | 61.03 (15.67)                       | 61.98 (14.11)                                         | 59.69 (17.77)                                             |
| Acute hospitalization length of stay                                                                                                                                     | 37.03 (31.8)                        | 39.4 (34.11)                                          | 33.69 (28.4)                                              |
| Inpatient rehabilitation unit length of stay                                                                                                                             | 13.43 (6.47)                        | 14.44 (6.06)                                          | 12 (6.84)                                                 |
| Documented delirium                                                                                                                                                      | 44 (57.1%)                          | 28 (62.2%)                                            | 16 (50%)                                                  |
| Intubation                                                                                                                                                               | 59 (76.6%)                          | 35 (77.8%)                                            | 24 (75%)                                                  |
| Intubation length                                                                                                                                                        | 13.31 (10.53)                       | 13.75 (10.03)                                         | 12.67 (11.37)                                             |
| Documented hypoxia                                                                                                                                                       | 69 (89.6%)                          | 39 (86.7%)                                            | 30 (93.8%)                                                |
| History of neurological diagnosis                                                                                                                                        | 2 (2.6%)                            | 1 (2.2%)                                              | 1 (3.1%)                                                  |
| Initial MoCA scores                                                                                                                                                      | 20.29 (5.47)                        | 17.96 (4.71)                                          | 23.47 (5.06)                                              |
| Discharge MoCA scores                                                                                                                                                    |                                     | 22.02 (4.23)                                          |                                                           |
| Initial QI-SC score                                                                                                                                                      | 25.75 (6.21)                        | 24.96 (4.94)                                          | 26.88 (7.59)                                              |
| Discharge QI-SC score                                                                                                                                                    | 36.57 (8.37)                        | 37.11 (6.97)                                          | 35.81 (10.09)                                             |

199 Note. MoCA = Montreal Cognitive Assessment; QI-SC = Quality Indicator for Self-Care; All  
200 values are N (%) or Mean (SD).

201

202 **Figure 1.** Classification of cognitive impairment by score on the Montreal Cognitive Assessment  
203 (MoCA) at admission in the full sample, admission in the subsample with discharge scores, and  
204 discharge in the latter sample.

205

206

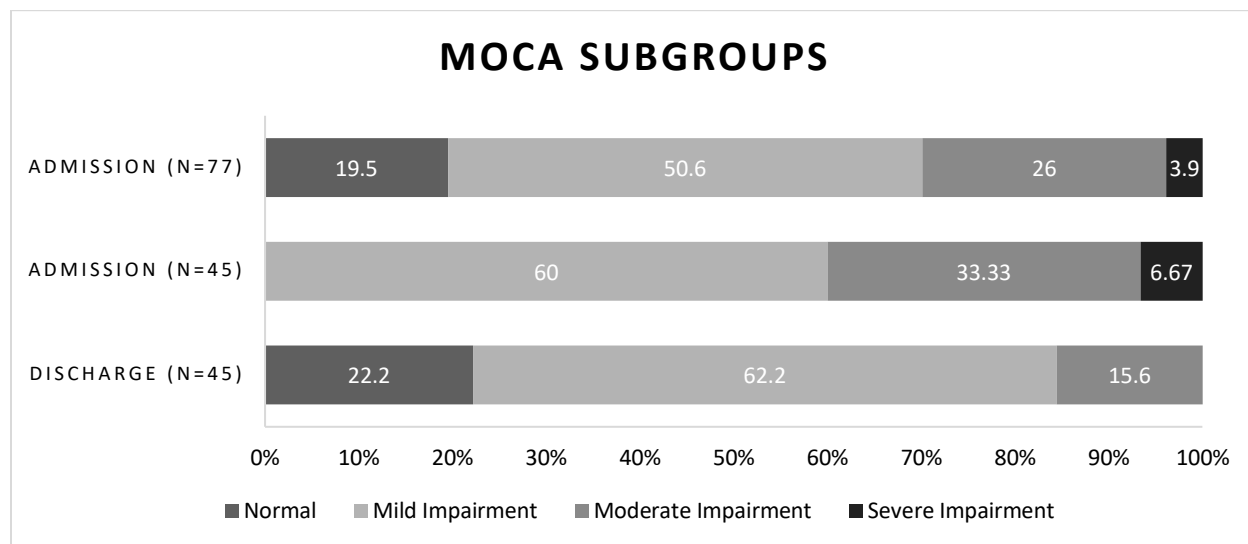

207
